# Supplementary material
Source: MDPI journal article supplement (https://www.mdpi.com/2073-4441/14/1/22)
Supplement: s1 [file s1]

**Table S1.** Surface water environmental quality standards part of the project standard limits.

| Project                   | Class I | Class II | Class III | Class IV | Class V |
|---------------------------|---------|----------|-----------|----------|---------|
| pH                        |         |          | 6 - 9     |          |         |
| NH <sub>4</sub> -N (mg/L) | 0.15    | 0.5      | 1.0       | 1.5      | 2.0     |
| TP (mg/L)                 | 0.02    | 0.1      | 0.2       | 0.3      | 0.4     |
| TN (mg/L)                 | 0.2     | 0.5      | 1.0       | 1.5      | 2.0     |
